# Supplementary material for: Quantitative analysis of plant ER architecture and dynamics
Source: PubMed Central journal article supplement (PMC6395764; doi:10.1038/s41467-019-08893-9), 2019-02-28
Supplement: 41467_2019_8893_MOESM1_ESM.pdf [file 41467_2019_8893_MOESM1_ESM.pdf]

Quantitative analysis of plant ER  
architecture and dynamics

*Pain et al.*

Supplementary Information

The screenshot displays the AnalyzER GUI with the following components:

- Directory:** Shows the file path 'GFP-HDELAlrymovie\_2\_rot300.czi'.
- Setup:** Includes options for channels (R, G, B), norm, 12 bit, and rotation.
- Profile:** Shows FWHM, peak, and time parameters.
- Image processing:** Includes resample, subtract, and guided options.
- Network template:** Includes T, C, and method settings.
- Skeleton extract:** Includes T1 boundary, thres2, and Feature Type settings.
- Optical flow:** Includes levels, iterati, filter, and scale settings.
- Display controls:** Includes image, filtered, merge method, and persistence options.
- Network extract:** Includes Sample, psf, sheet, and int to um settings.
- Tubule analysis:** Includes Analysis, Morphology, Trace, Distance, and Region settings.
- Cisternal analysis:** Includes Statistics, Perimeter, Profile, and Polygonal regions settings.
- Results:** Shows a table of statistics for the tubule network.
- Output:** Includes options for export, save image, save mat, and save data.

| target             | grouping | med      | mod | var | skw | kut | min | max |
|--------------------|----------|----------|-----|-----|-----|-----|-----|-----|
| graph              | channel  |          |     |     |     |     |     |     |
| channel 1          |          |          |     |     |     |     |     |     |
| GroupCount_graph   |          | 10       |     |     |     |     |     |     |
| mean_G             |          | 1        |     |     |     |     |     |     |
| mean_nodes         |          | 277.7000 |     |     |     |     |     |     |
| mean_edges         |          | 334      |     |     |     |     |     |     |
| mean_total_length  |          | 1.2237   |     |     |     |     |     |     |
| mean_mean_length   |          | 3.6702   |     |     |     |     |     |     |
| mean_median_length |          | 1.0547   |     |     |     |     |     |     |

## Supplementary figure 1: AnalyzER: A Graphical User Interface (GUI) for rapid ER analysis

The GUI used for complete analysis of ER structure and dynamics, demonstrating typical settings for the analysis of a 50 frame, single channel time series, with the graph representation of tubule length and cisternal area shown. A complete description of the interface is available in the accompanying manual available from the Oxford Research Archive:

<https://ora.ox.ac.uk/objects/uuid:cb0e2845-2a9c-495a-84f0-4dd2c5164463>

### (a) Cisternal measurements

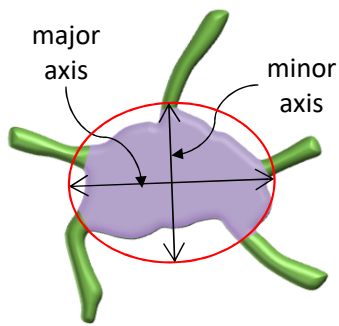

**Morphology**  
area  
perimeter  
orientation  
eccentricity  
circularity  
roughness  
solidity

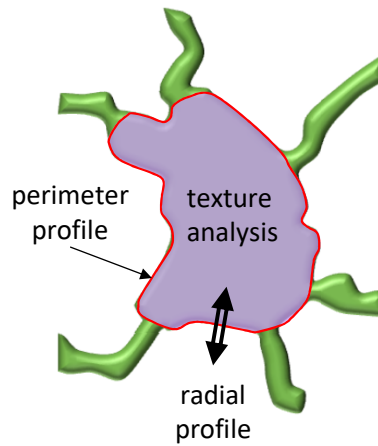

**Texture**  
intensity  
variance  
contrast  
correlation  
energy  
homogeneity

**Dynamics**  
persistence  
speed  
direction  
curl  
divergence  
coherence

### (b) polygonal region measurements

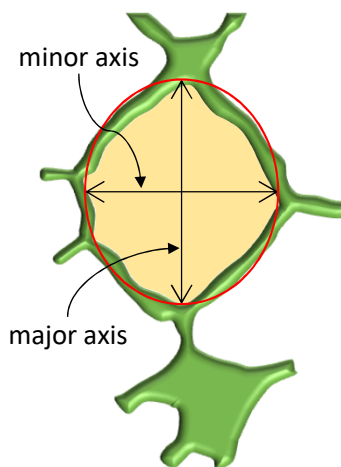

**Morphology**  
area  
perimeter  
orientation  
eccentricity  
circularity  
roughness  
solidity

### (c) Tubule measurements

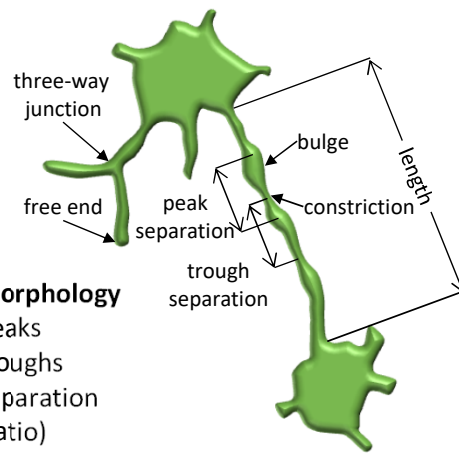

**Morphology**  
peaks  
troughs  
separation  
(ratio)  
(covariance)

**Morphology**  
width  
surface area  
length  
volume  
Tortuosity

**Dynamics**  
persistence  
speed  
direction  
coherence  
curl  
divergence

### (d) Graph measurements

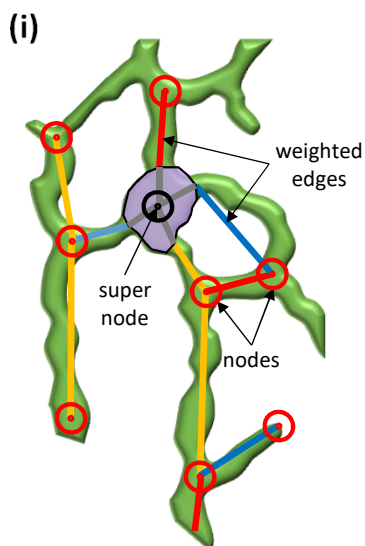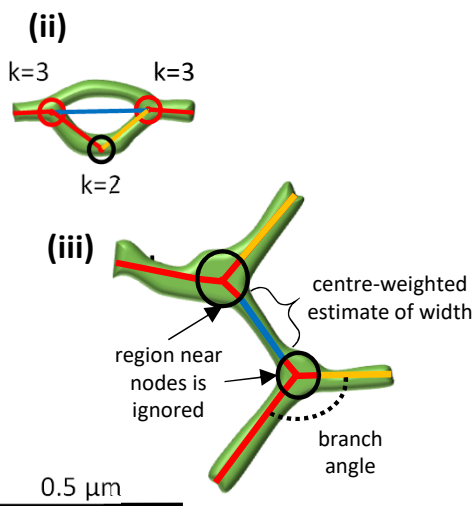

**Graph-theoretic**  
total length  
mean width  
total volume  
tubule density  
node density  
cisternal density  
average degree  
global efficiency  
meshedness  
free end ratio  
betweenness  
centrality

## Supplementary figure 2: Schematic illustrations of the main ER metrics automatically measured in the AnalyzER program

Schematic diagrams showing the morphological measurements made for cisternae (a); polygonal regions (b); and tubules (c); along with the conversion to a weighted graph representation where each edge and node was associated with a vector of properties (d(i)). (d(ii)) Two tubules connected to the same junctions were resolved in the graph representation by creating an additional  $k=2$  node in the longer arm. (d(iii)) The tubule width was estimated from the central part of the tubule excluding the region near the nodes.

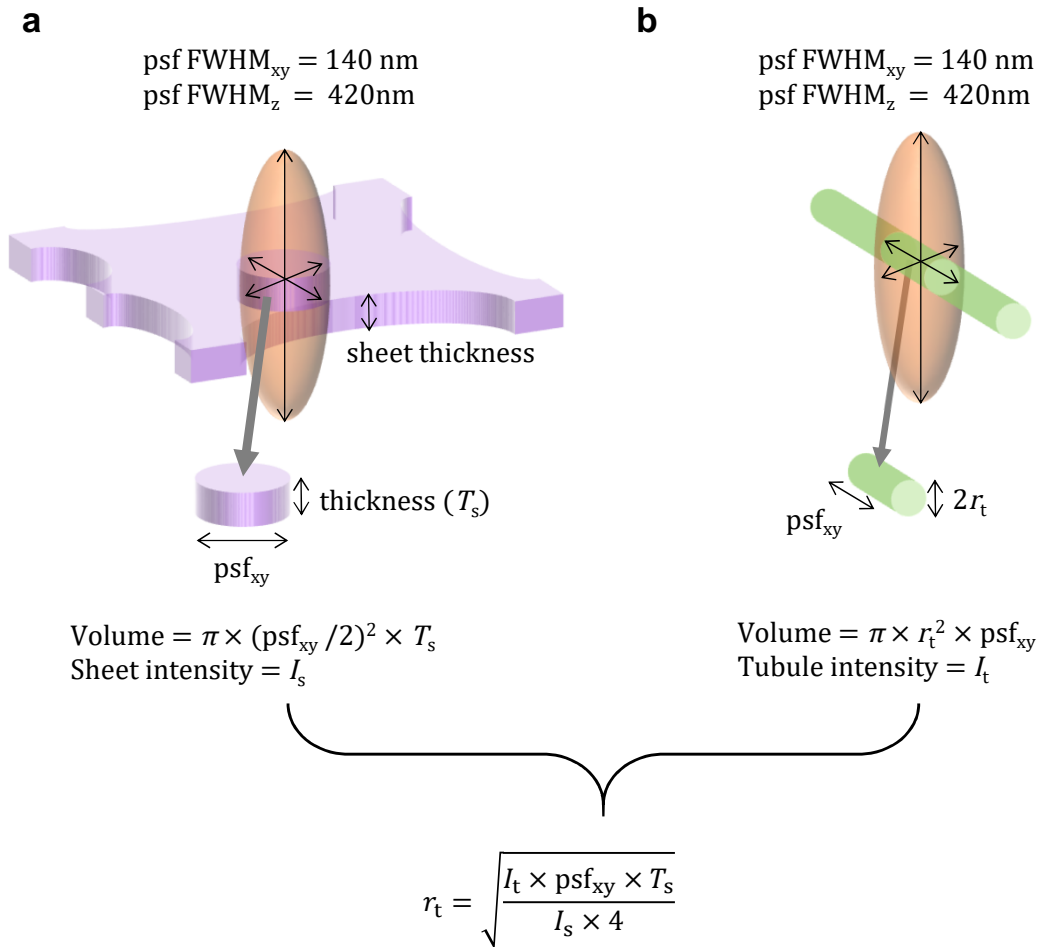

### Supplementary figure 3: Estimation of tubule width from intensity measurements

(a) A cysternal sheet provides an internal reference for the amount of fluorescence intensity ( $I_s$ ) expected from a defined volume of ER when sampled with a stylised point spread function (psf), shown here with dimensions appropriate for the Zeiss Airyscan confocal microscope. The volume approximates to a flattened cylinder with a radius given by half the full-width half-maximum (FWHM) of the psf in the xy plane ( $\text{psf}_{xy}$ ), and the length equivalent to the thickness of the sheet ( $T_s$ ), independently measured as  $40.51 \text{ nm} \pm 0.82$  (mean  $\pm$  SD,  $n=1$ , 25 technical repeats) using SBF-SEM. (b) The intensity ( $I_t$ ) for a tubule sampled with the same psf would be expected to scale with the relative volume of the tubule, approximated as a horizontal cylinder with length equal to  $\text{psf}_{xy}$  and the radius ( $r_t$ ) as the unknown. The radius is estimated as:  $r_t = \sqrt{\frac{I_t \times \text{psf}_{xy} \times T_s}{I_s \times 4}}$

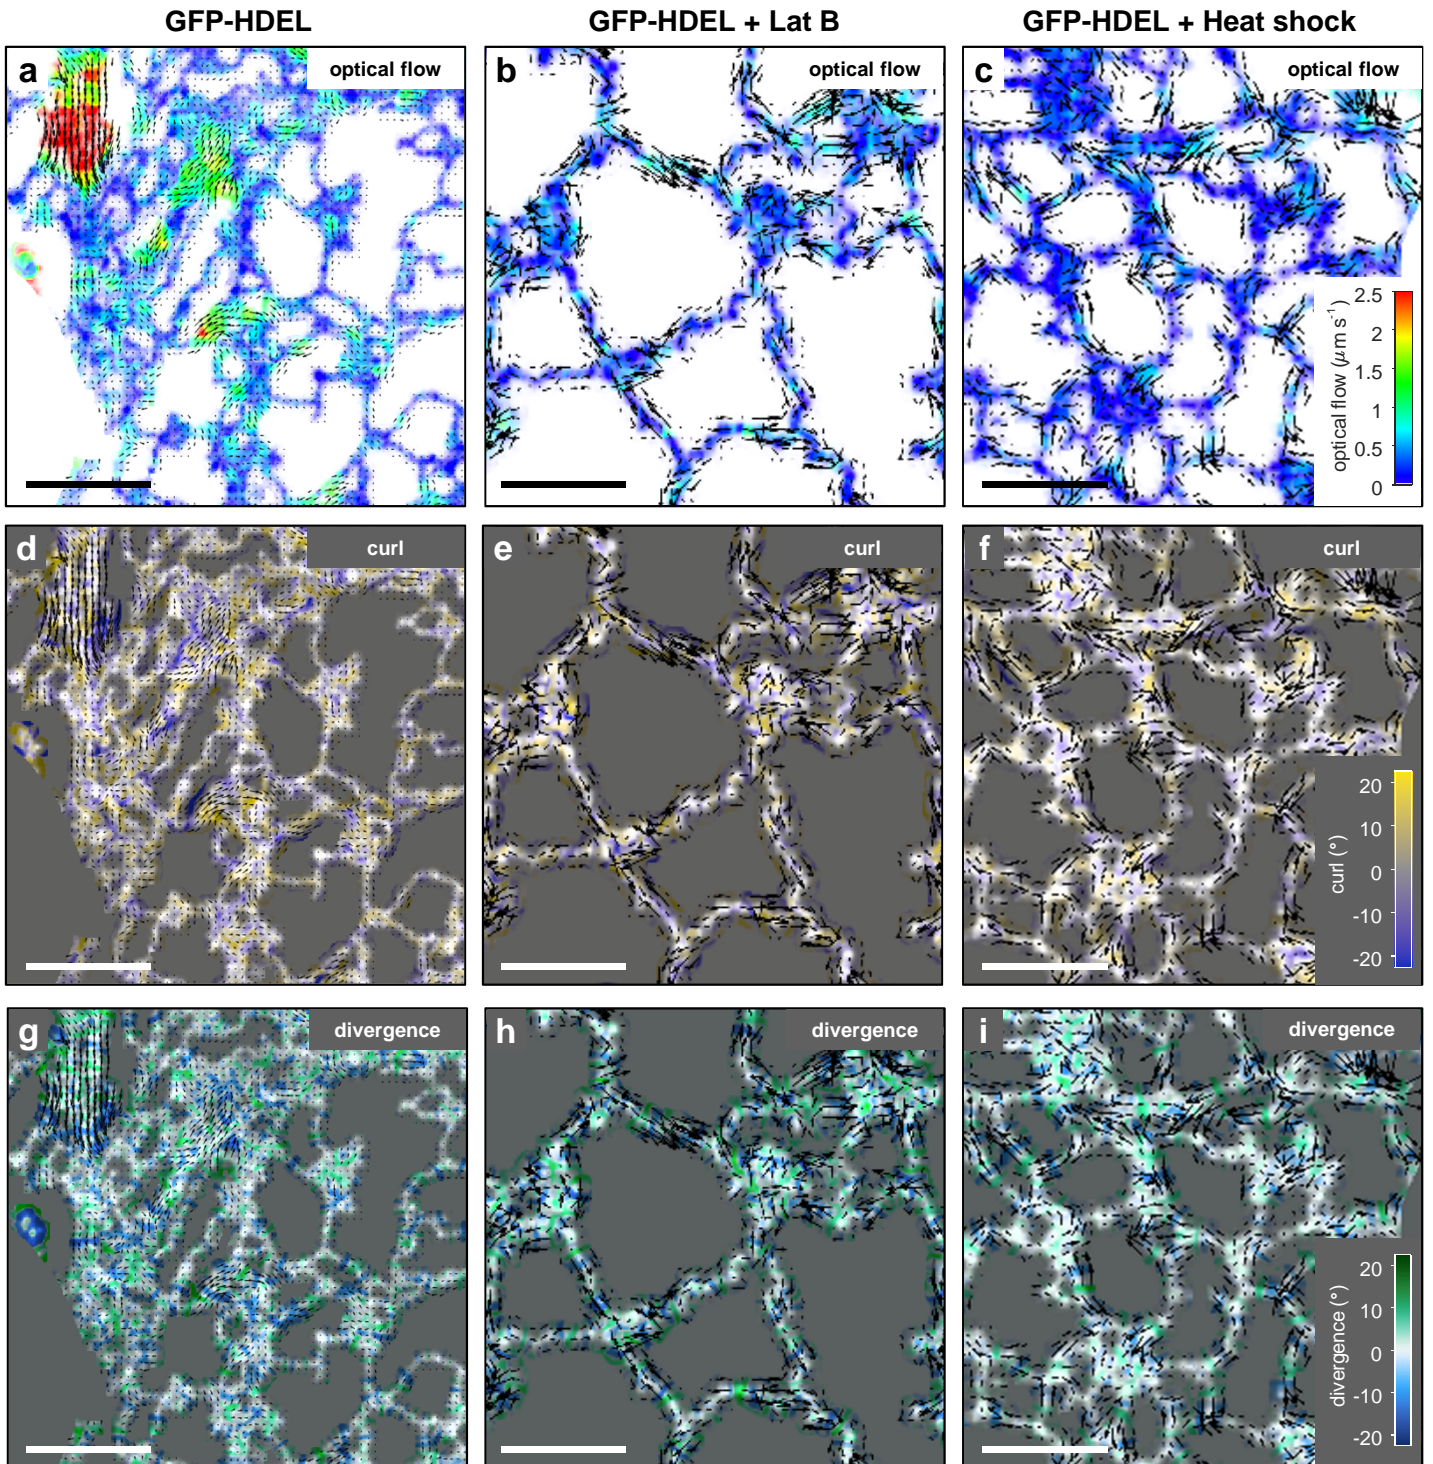

### Supplementary Figure 4: Mapping flow curl and divergence

The velocity field calculated from the optical flow (a-c) was analysed for the local curl (d-f) and divergence (g-i) for HDEL controls (a,d,g), and after treatment with Lat B (b,e,h) or heat shock (c,f,i). Images were pseudo-colour coded according to the inset colour scales. Scale bars = 5  $\mu\text{m}$ .

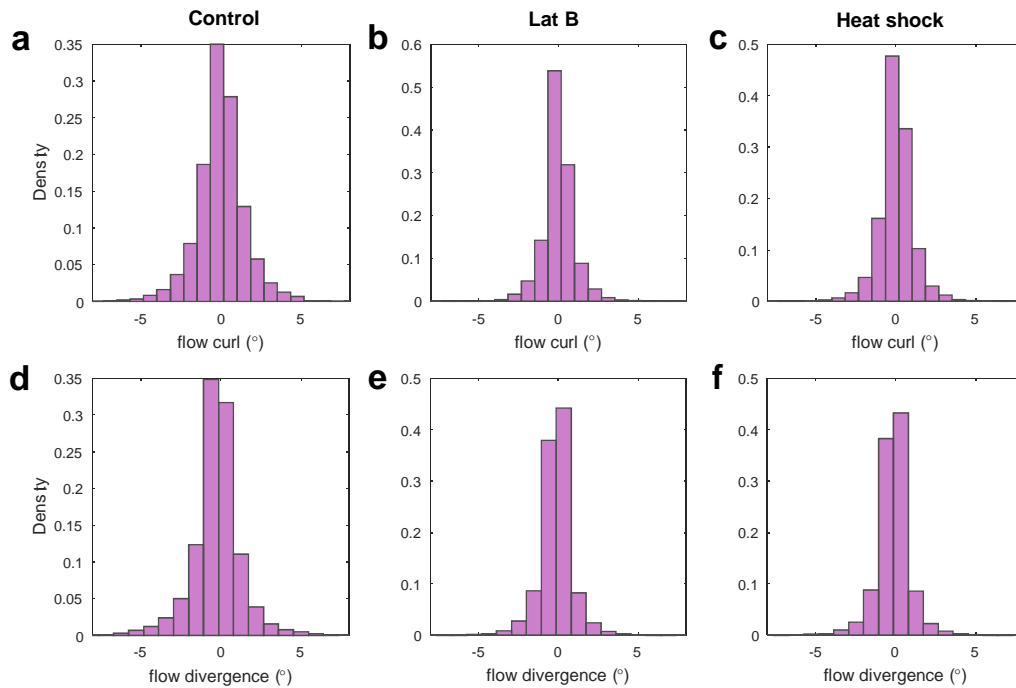

### Supplementary figure 5: Quantifying flow curl and flow divergence for cisternae

Density histograms of flow curl (a-c) and flow divergence (d-f) derived from optical flow measurements of cisternae from HDEL controls (a,d), compared to Lat B (b,e) or heat shock (c,f) show a greater spread in the distribution for the controls for both variables, but little difference between Lat B and heat shock treatments (GFP-HDEL, n=6, Lat B, n=8, Heat shock, n=8, where n is the number of independent 50-frame time-series images). Source data are provided as a Source Data file.

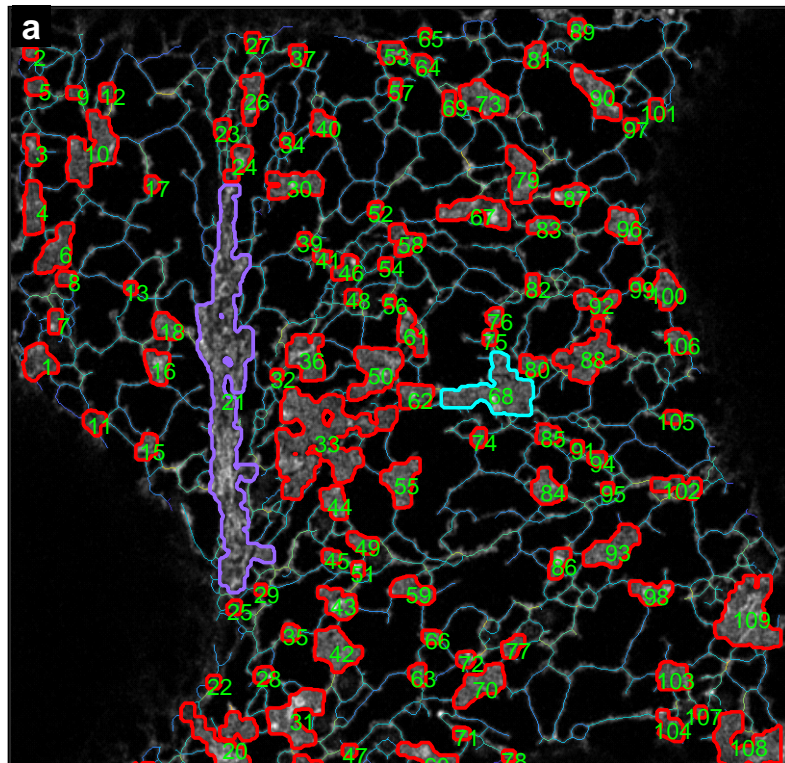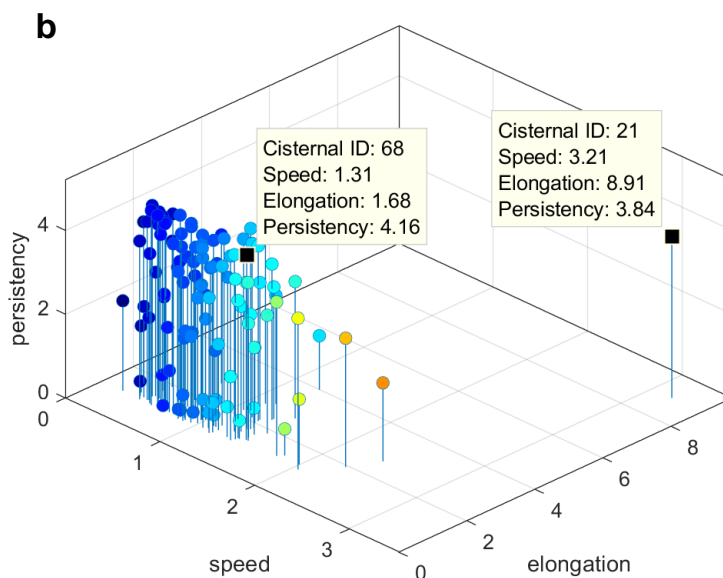

### Supplementary figure 6: Classification of cisterna

Cisternae are identified as structures remaining after removal of the tubules by image opening. These structures include sheet-like regions of the ER, but also regions where tubules are closely appressed that cannot be segmented without recourse to super-resolution techniques. This is particularly true in the streaming cytoplasm, where segmentation is further complicated by movement. However, it is straightforward to group cisternae into different classes using a range of metrics. (a) shows a single image from a 50 frame time series of a tobacco epidermal cell expressing GFP-HDEL, with the tubule pixel skeleton colour-coded according to average width, and the cisternae outlined in red. An elongated cisterna in the streaming cytoplasm that probably represents a ribbon of appressed tubules and cisternae that cannot be resolved, is outlined in magenta, and a reference cisterna in cyan. (b) a 3D scatter plot of all the cisternae shows the cisterna in the streaming cytoplasm is clearly separated from the other cisternae in terms of elongation and speed.
